# Supplementary material for: Transcription of a 5’ extended mRNA isoform directs dynamic chromatin changes and interference of a downstream promoter
Source: eLife journal article supplement (doi:10.7554/elife.27420), 2017-09-14
Supplement: supp [file elife-27420-supp-v1.zip]

Archive with 7 entries (7 files):
- elife_poa_e27420_Figure_4_figure_supplement_1.ai
- elife_poa_e27420_Figure_1_figure_supplement_1.ai
- elife_poa_e27420_Figure_3_figure_supplement_1.ai
- elife_poa_e27420_"Figure_5_figure_supplement_1.ai
- elife_poa_e27420_Supplementary_File_2.docx
- elife_poa_e27420_Transparent_Reporting_File.pdf
- elife_poa_e27420_Supplementary_File_1.docx
